# Supplementary material for: The solid-phase extraction of α-chymotrypsin based on a novel porous polymeric dianionic ionic liquid-coated magnetic material
Source: Royal Society of Chemistry journal article supplement (doi:10.1039/c7ra09434e), 2017-01-01
Supplement: c7ra09434e1.pdf [file c7ra09434e1.pdf]

**Fig. S1** Magnetization curves of  $\text{Fe}_3\text{O}_4@\text{CMC}$  (A),  $\text{Fe}_3\text{O}_4@\text{CMC}@\text{PPDIL}$  (B),  $\text{Fe}_3\text{O}_4@\text{CMC}@\text{PDIL}$  (C) and  $\text{Fe}_3\text{O}_4@\text{CMC}@\text{PDIL}/\text{CaCO}_3$  (D).

**Fig. S2** TGA thermograms of  $\text{Fe}_3\text{O}_4@\text{CMC}$  (A),  $\text{Fe}_3\text{O}_4@\text{CMC}@\text{PPDIL}$  (B),  $\text{Fe}_3\text{O}_4@\text{CMC}@\text{PDIL}$  (C) and  $\text{Fe}_3\text{O}_4@\text{CMC}@\text{PDIL}/\text{CaCO}_3$  (D).

**Fig. S3** FT-IR spectrum of DIL-monomer (A),  $\text{Fe}_3\text{O}_4@\text{CMC}$  (B),  $\text{Fe}_3\text{O}_4@\text{CMC}@\text{PPDIL}$  (C),  $\text{Fe}_3\text{O}_4@\text{CMC}@\text{PDIL}$  (D) and  $\text{Fe}_3\text{O}_4@\text{CMC}@\text{PDIL}/\text{CaCO}_3$  (E).

**Fig. S4** Zeta potentials of  $\text{Fe}_3\text{O}_4@\text{CMC}$ ,  $\text{Fe}_3\text{O}_4@\text{CMC}@\text{PPDIL}$ ,  $\text{Fe}_3\text{O}_4@\text{CMC}@\text{PDIL}$  and  $\text{Fe}_3\text{O}_4@\text{CMC}@\text{PDIL}/\text{CaCO}_3$ .

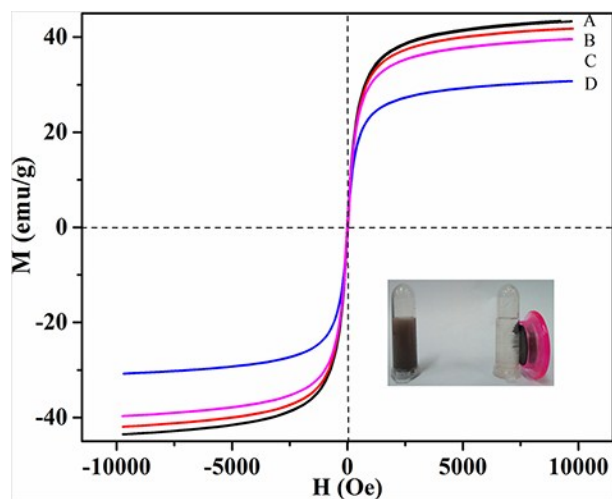

**Fig. S1** Magnetization curves of  $\text{Fe}_3\text{O}_4@CMC$  (A),  $\text{Fe}_3\text{O}_4@CMC@PPDIL$  (B),  $\text{Fe}_3\text{O}_4@CMC@PDIL$  (C) and  $\text{Fe}_3\text{O}_4@CMC@PDIL/CaCO_3$  (D).

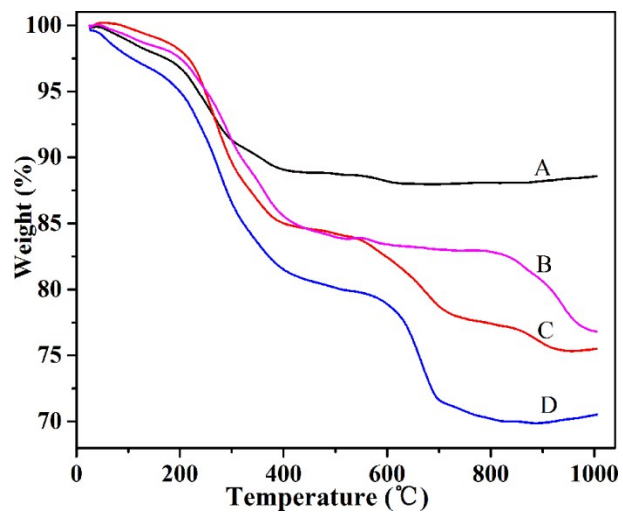

**Fig. S2** TGA thermograms of  $\text{Fe}_3\text{O}_4@\text{CMC}$  (A),  $\text{Fe}_3\text{O}_4@\text{CMC}@\text{PPDIL}$  (B),  $\text{Fe}_3\text{O}_4@\text{CMC}@\text{PDIL}$  (C) and  $\text{Fe}_3\text{O}_4@\text{CMC}@\text{PDIL}/\text{CaCO}_3$  (D).

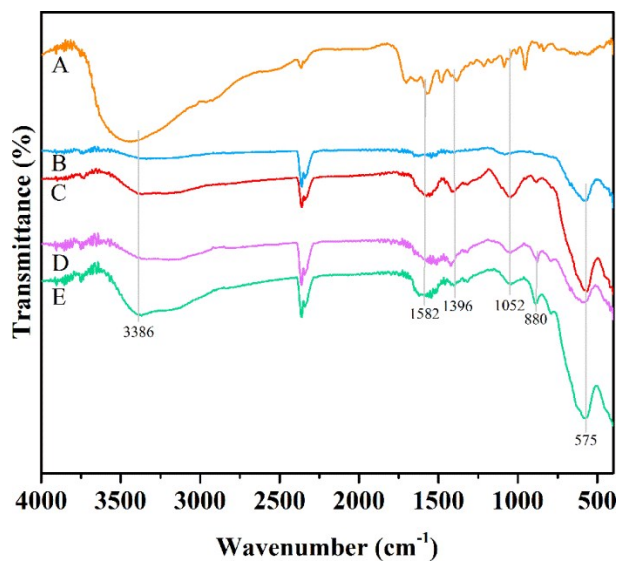

**Fig. S3** FT-IR spectrum of DIL-monomer (A), Fe<sub>3</sub>O<sub>4</sub>@CMC (B), Fe<sub>3</sub>O<sub>4</sub>@CMC@PPDIL (C), Fe<sub>3</sub>O<sub>4</sub>@CMC@PDIL (D) and Fe<sub>3</sub>O<sub>4</sub>@CMC@PDIL/CaCO<sub>3</sub> (E).

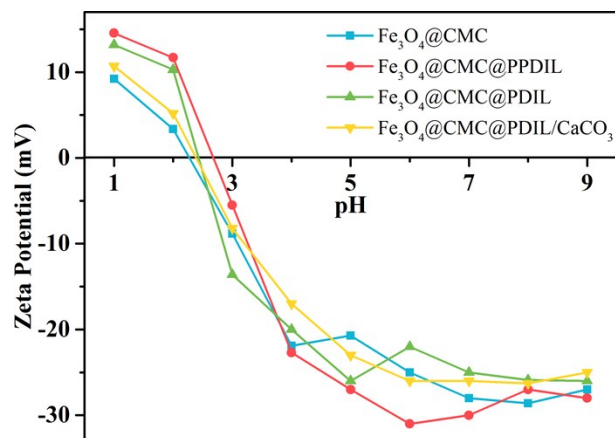

**Fig. S4** Zeta potentials of Fe<sub>3</sub>O<sub>4</sub>@CMC, Fe<sub>3</sub>O<sub>4</sub>@CMC@PPDIL, Fe<sub>3</sub>O<sub>4</sub>@CMC@PDIL and Fe<sub>3</sub>O<sub>4</sub>@CMC@PDIL/CaCO<sub>3</sub>.
